# Supplementary material
Source: publisher figshare collection journal article supplement (https://sage.figshare.com/ndownloader/files/31271578)
Supplement: Supplementary file 1 [file 31271578]

**Questionnaire**

Statement of the research idea and approval for participation in the study:

We are a group of medical students at King Faisal University conducting a research project about the Perception of Medical Students of Plastic Surgery. The purpose of this study is to collect data about the beliefs and knowledge regarding plastic surgery amongst Medical Students in the KSA. You have been randomly selected to participate in this study and your participation is strictly voluntary. There are no risks associated with participation in this study. The questionnaire is anonymous and we assure you that your responses will be confidential and will be used only for the research purposes.

**What's your gender?** *

- Male
- Female

**Confirm the University do you study currently at?** *

King Faisal University

**What was your educational level you have finished?** *

- Year 1
- Year 2
- Year 3
- Year 4
- Year 5
- Internship/Year6

**Living status?** *

- Parents
- Alone
- University housing
- Spouse
- Other:

**Have you been previously exposed to Plastic Surgery clinically?** *

- Yes
- No

**Are you interested in Plastic Surgery procedure?** *

- Yes
- No

**What surgical specialty have you been clinically exposed previously?** *

- General Surgery
- Orthopedic Surgery
- Plastic Surgery
- ENT
- Neurosurgery
- Obstetric/Gynecology
- Cardiac Surgery
- Urology
- Dermatologist
- Ophthalmologist
- Vascular Surgery
- Hand Specialist
- None of the above

**What future specialty have you planned?** *

**How interested are you in pursuing Plastic Surgery as a specialty?** *

Highly Unlikely 1 2 3 4 5 Highly Likely

**Which of the following do you consider a barrier to pursuing Plastic Surgery as a specialty? (tick all that applies)** *

- Difficulty entering residency programs
- I do not feel it has enough impact on people's lives
- Religious reasons
- I do not have enough information about the topic
- Social stigma
- Verbal discouragement from peers, mentors or friends

For the following question, please rotate your phone to better access all options or scroll to the right.

**Please read the following cases and tick all specialties that apply to manage them** *

General Surgery

Orthopedics

Plastic Surgery

ENT

Neurology/Neurosurgery

Obstetric and Gynecology

Cardiothoracic Surgery

Urology

Dermatology

Opthalmology

Vascular Surgery

Hand Specialist

- Severed finger in an accident
- Severing the extensor tendon of the index finger
- Scaphoid bone fracture
- Third degree burn on the back of the hand
- Carpal tunnel syndrome
- Rheumatoid arthropathy with pain of the right hand
- Jaw fracture
- Broken nose
- -Cosmetic nose reshaping
- Cleft lip anomaly
- Skull deformity affecting brain growth for a 2 years old child
- Child born without an ear
- Deviated nasal septum
- Knife cut to the ulnar nerve
- Brachial plexus injury from motorcycle accident
- Ptosis slightly covering the eye field
- Paraplegic patient with large pressure sore at the buttock
- Burn covering 50% of TBSA
- Sex reassignment surgery
- Breast reconstruction after mastectomy
- Surgical debridement and removal of sternal bone after wound infection post heart transplant
- Child with partial facial paralysis since birth
- Elderly wants to treat his wrinkles
- Muscle implant over exposed non fractured-tibia after car accident

**How often do you spend researching the topic online? * (Google searches or reading articles about plastic surgery online)**

- Never
- -Sometimes
- Occasionally
- Often

**What influenced the majority of your impression on Plastic Surgery?** *

- Surfing the Internet
- Television/Series
- Personal encounter/experience
- Social media
- Clinical rotations
- Other:
